# Supplementary material
Source: Springer Nature journal article supplement (https://www.springermedizin.de/resource/supplementary/12876_2014_1170_MOESM6_ESM.pdf/9438232)

**A**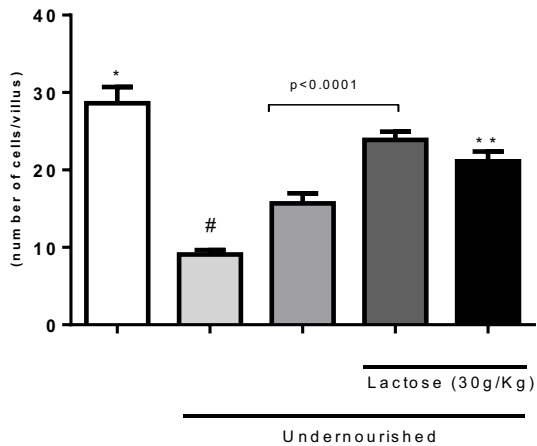

Nourished control
   
 UN
   
 UN + Zn
   
 UN + Lac
   
 UN + Lac + Zn

\*  $p < 0.0001$  vs UN, UN + Zn, and UN + Lac and  $p < 0.05$  vs UN + Lac

#  $p < 0.0001$  vs all groups

\*\*  $p < 0.05$  vs UN + Zn and UN + Lac + Zn

**B**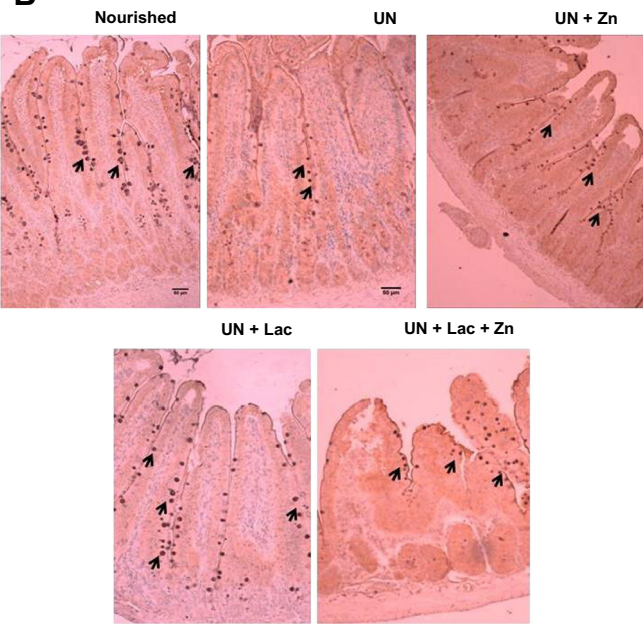

Supplement: MOESM6 [file 9438232]
